# Supplementary material
Source: Springer Nature journal article supplement (https://www.springermedizin.de/resource/supplementary/12936_2012_2116_MOESM2_ESM.pdf/9542492)
Supplement: MOESM2 [file 9542492]

**Additional file 2 Primers used for *Plasmodium falciparum* erythrocyte protein 1 full length (FL) and multi-domain expression.**

| Protein name | PfEMP1    | Genome | Domains |          |         |         |          |          |        |   | Group                          | Forwardprimer                               | Reverseprimer |
|--------------|-----------|--------|---------|----------|---------|---------|----------|----------|--------|---|--------------------------------|---------------------------------------------|---------------|
| var2csa FL   | IT4var04  | FCR3   | DBLpam1 | DBLpam2  | CIDRpam | DBLpam3 | DBLepam4 | DBLepam5 | DBLe10 | E | a                              | a                                           |               |
| 30/28-2 FL   | PF11820w  | 3D7    | DBLa13  | DBLe8    |         |         |          |          |        | A | b                              | b                                           |               |
| 420/421 FL   | PF11_0007 | 3D7    | DBLa0.1 | CIDRa3.2 | DBLd1   | CIDRb1  |          |          |        | B | CGGATCCCA TGGAGCCGCATGGAGGTAG  | CTGCGGCCGCTACAA GCGCCTTTTTCTCTGC            |               |
| 238/245      | IT4var02  | FCR3   | DBLg12  | DBLd5    | CIDRb3  | DBLb9   |          |          |        | A | CGGATCCCTGCGAAATAGTGGAGGATC    | TGCGGCCGCTACACTTACCGCACCCTTATAC             |               |
| 232/235      | PF11_0008 | 3D7    | DBLd5   | CIDRb4   |         |         |          |          |        | A | CGGATCCCTGCGAAATCGTGGATAAAAC   | TGCGGCCGCTACAAAAAGTGGGTGCAACG               |               |
| 51/56        | PFL0020w  | 3D7    | DBLg14  | DBLz5    | DBLe4   |         |          |          |        | B | CTCTA GAATGTAA TCAGAAAAGTGACGC | TGCGGCCGCTGTA TTTTCTA TTA TTTTCA TCAAAATTAC |               |
| 69/74        | MAL6P1.4  | 3D7    | DBLe2   | DBLe7    | DBLe3   |         |          |          |        | B | CGGATCCCTGTGAAAATTTTAGAACTC    | TGCGGCCGCTATTCAGAGAGACAATGAAC               |               |

a Previously published [47]

b Previously published [48]
